# Supplementary material
Source: PubMed Central journal article supplement (PMC4242447)
Supplement: supp_M052308_jlr.M052308-1.pdf [file supp_M052308_jlr.M052308-1.pdf]

# Supplemental Data

## A HFD suppresses de novo lipogenesis and desaturation, but not elongation and triglyceride synthesis in mice

Joao A. G. Duarte<sup>1,4</sup>, Filipa Carvalho<sup>4</sup>, Mackenzie Pearson<sup>1</sup>, Jay D. Horton<sup>2</sup>, Jeffrey D. Browning<sup>2</sup>, John G. Jones<sup>4</sup> and Shawn C. Burgess<sup>1,3</sup>

<sup>1</sup>AIRC Division of Metabolic Mechanisms of Disease, <sup>2</sup> Department of Internal Medicine and <sup>3</sup>Department of Pharmacology, The University of Texas Southwestern Medical Center, Dallas, Texas, USA, <sup>4</sup> Center for Neurosciences and Cell Biology, Department of Zoology, University of Coimbra, Coimbra, Portugal

**Running Header:** High fat diet suppresses hepatic lipogenesis

**Supplemental Tables: 8**

**Supplemental Figures: 1**

### Correspondence and Reprint Requests:

Shawn C. Burgess, Ph.D  
Associate Professor  
Department of Pharmacology and  
The Advanced Imaging Research Center  
5323 Harry Hines Blvd.  
Dallas, Texas 75390-8568  
+1 (214)645-2728  
+1 (214)645-2744 (fax)  
shawn.burgess@utsouthwestern.edu

Supplemental table 1: Hepatic glycerol and fatty acid concentrations

|                                                      | SREBP1-a   |            |         | Coconut Oil |            |         | SCD-1 Inhibitor |           |         |
|------------------------------------------------------|------------|------------|---------|-------------|------------|---------|-----------------|-----------|---------|
|                                                      | control    | transgenic | p value | control     | Oil gavage | p value | control         | inhibitor | p value |
| <b>Fatty acid per glycerol unit</b>                  | 2.82±0.08  | 2.95±0.03  | NS      | 3.07±0.12   | 2.99±0.13  | NS      | 3.30±0.10       | 4.28±1.06 | NS      |
| <b>Hepatic glycerol concentration (mg/g liver)</b>   | 1.50±0.37  | 10.65±0.60 | <0.001  | 4.39±0.85   | 4.51±0.57  | NS      | 3.09±0.82       | 0.32±0.06 | <0.05   |
| <b>Hepatic fatty acid concentration (mg/g liver)</b> | 12.50±3.06 | 91.54±5.83 | <0.01   | 41.69±9.42  | 41.41±3.63 | NS      | 31.49±6.10      | 3.36±0.47 | <0.01   |

Supplemental table 2: Fatty acid characteristics in SREBP1-a transgenic and control liver

---

|                                                 | SREBP1-a |            | p     |
|-------------------------------------------------|----------|------------|-------|
|                                                 | control  | transgenic | value |
| <b>Average number of carbons per fatty acid</b> | 17.2±0.4 | 17.2±0.1   | NS    |
| <b>Average molecular weight of fatty acids</b>  | 270±5    | 270±2      | NS    |

---

Data are represented as the mean ± SE (n=5).

Supplemental table 3: <sup>2</sup>H enrichments of each detectable individual NMR peak

|          | <b>SREBP1-a</b> |            |         | <b>Coconut Oil</b> |            |         | <b>SCD-1 Inhibitor</b> |           |         |
|----------|-----------------|------------|---------|--------------------|------------|---------|------------------------|-----------|---------|
|          | control         | transgenic | p value | Control            | Oil gavage | p value | control                | inhibitor | p value |
| <b>A</b> | 0.51±0.04       | 1.27±0.03  | <0.001  | 0.25±0.02          | 0.24±0.02  | NS      | 0.44±0.14              | 0.18±0.06 | NS      |
| <b>D</b> | 0.34±0.03       | 0.77±0.01  | <0.001  | 0.21±0.005         | 0.22±0.05  | NS      | 0.40±0.13              | 0.15±0.05 | NS      |
| <b>E</b> | 0.38±0.03       | 0.68±0.03  | <0.001  | 0.30±0.01          | 0.32±0.05  | NS      | 0.40±0.06              | 0.27±0.04 | NS      |
| <b>F</b> | 0.13±0.03       | 0.56±0.01  | <0.001  | 0.05±0.02          | 0.04±0.02  | NS      | 0.03±0.01              | 0.00±0.00 | <0.05   |
| <b>H</b> | 0.42±0.03       | 0.96±0.02  | <0.001  | 0.30±0.01          | 0.34±0.04  | NS      | 0.41±0.07              | 0.35±0.07 | NS      |
| <b>L</b> | 1.17±0.14       | 1.06±0.04  | NS      | 1.17±0.15          | 1.29±0.10  | NS      | 1.30±0.18              | 1.27±0.05 | NS      |

Supplemental table 4: Body water <sup>2</sup>H enrichments

|                              | SREBP1-a  |            |         | Coconut Oil |            |         | SCD-1 Inhibitor |           |         |
|------------------------------|-----------|------------|---------|-------------|------------|---------|-----------------|-----------|---------|
|                              | control   | transgenic | p value | Control     | Oil gavage | p value | control         | inhibitor | p value |
| <b>Body Water enrichment</b> | 3.85±0.19 | 4.09±0.24  | NS      | 3.48±0.10   | 3.87±0.17  | NS      | 3.28±0.12       | 2.91±0.06 | NS      |

Supplemental table 5: Hepatic and WAT triglycerides in HFD and control non-fasted BDF1 mice

|                                                     | Liver     |               |         | White adipose tissue |               |         |
|-----------------------------------------------------|-----------|---------------|---------|----------------------|---------------|---------|
|                                                     | Control   | High fat diet | p value | Control              | High fat diet | p value |
| <b>Fatty acid per glycerol unit</b>                 | 3.04±0.02 | 3.05±0.01     | NS      | 3.2±0.3              | 2.93±0.02     | NS      |
| <b>Hepatic glycerol concentration (mg/g tissue)</b> | 2.96±0.20 | 4.65±0.20     | <0.05   | 38±8                 | 46±4          | NS      |
| <b>Fatty acid concentration (mg/g tissue)</b>       | 27±2      | 41±2          | <0.05   | 320±63               | 396±31        | NS      |

Data are represented as the mean ± SE (n=5).

Supplemental table 6: Chain length and molecular weight of fatty acid species in HFD and control BDF1 mice

|                                                 | Liver    |               |         | White Adipose tissue |               |         |
|-------------------------------------------------|----------|---------------|---------|----------------------|---------------|---------|
|                                                 | Control  | High fat diet | p value | Control              | High fat diet | p value |
| <b>Average number of carbons per fatty acid</b> | 17.4±0.4 | 16.9±0.1      | NS      | 15.7±1               | 17.1±0.12     | NS      |
| <b>Average molecular weight of fatty acids</b>  | 273±5    | 267±1         | NS      | 249±13               | 268.46±1      | NS      |

Data are represented as the mean ± SE (n=5).

Supplemental table 7:  $^2\text{H}$  enrichments of each detectable individual NMR peak of BDF1 mice

|          | Liver     |               |         | White adipose tissue |               |         |
|----------|-----------|---------------|---------|----------------------|---------------|---------|
|          | Control   | High fat diet | p value | Control              | High fat diet | p value |
| <b>A</b> | 0.32±0.02 | 0.05±0.01     | <0.001  | 0.07±0.04            | 0.01±0.0003   | NS      |
| <b>D</b> | 0.22±0.01 | 0.05±0.01     | <0.001  | 0.05±0.02            | 0.001±0.001   | NS      |
| <b>E</b> | 0.25±0.01 | 0.10±0.02     | <0.001  | 0.02±0.01            | 0.001±0.001   | NS      |
| <b>F</b> | 0.13±0.01 | 0.004±0.002   | <0.001  | 0.01±0.009           | 0.00±0.00     | NS      |
| <b>H</b> | 0.33±0.06 | 0.11±0.02     | <0.05   | 0.03±0.02            | 0.002±0.001   | NS      |
| <b>L</b> | 0.53±0.02 | 0.59±0.06     | NS      | 0.36±0.06            | 0.55±0.03     | <0.05   |



Supplemental table 8: Body water <sup>2</sup>H enrichments of BDF1 mice

| <b>BDF1</b>                  |           |           |         |
|------------------------------|-----------|-----------|---------|
|                              | control   | HFD       | p value |
| <b>Body Water enrichment</b> | 4.85±0.40 | 5.09±0.35 | NS      |

**Supplemental Figure 1:** Lipidomic and flux in adipose of mice fed a low fat control or HFD. (A-B) Lipid species determined from  $^1\text{H}$  NMR spectra of liver. (C) Percent contribution of de novo lipogenesis (DNL) and desaturation and elongation to adipose triglyceride fatty acids during 4 days of  $^2\text{H}_2\text{O}$  exposure. (D) Mass of triglyceride fatty acids derived from DNL and desaturation. (E) Percent of triglyceride glycerol that was newly made during  $^2\text{H}_2\text{O}$  exposure. (F) Mass of fatty acids on new glyceride. Data are presented as the mean  $\pm$  SE (n=4-5). \* Different from control  $p < 0.05$ .

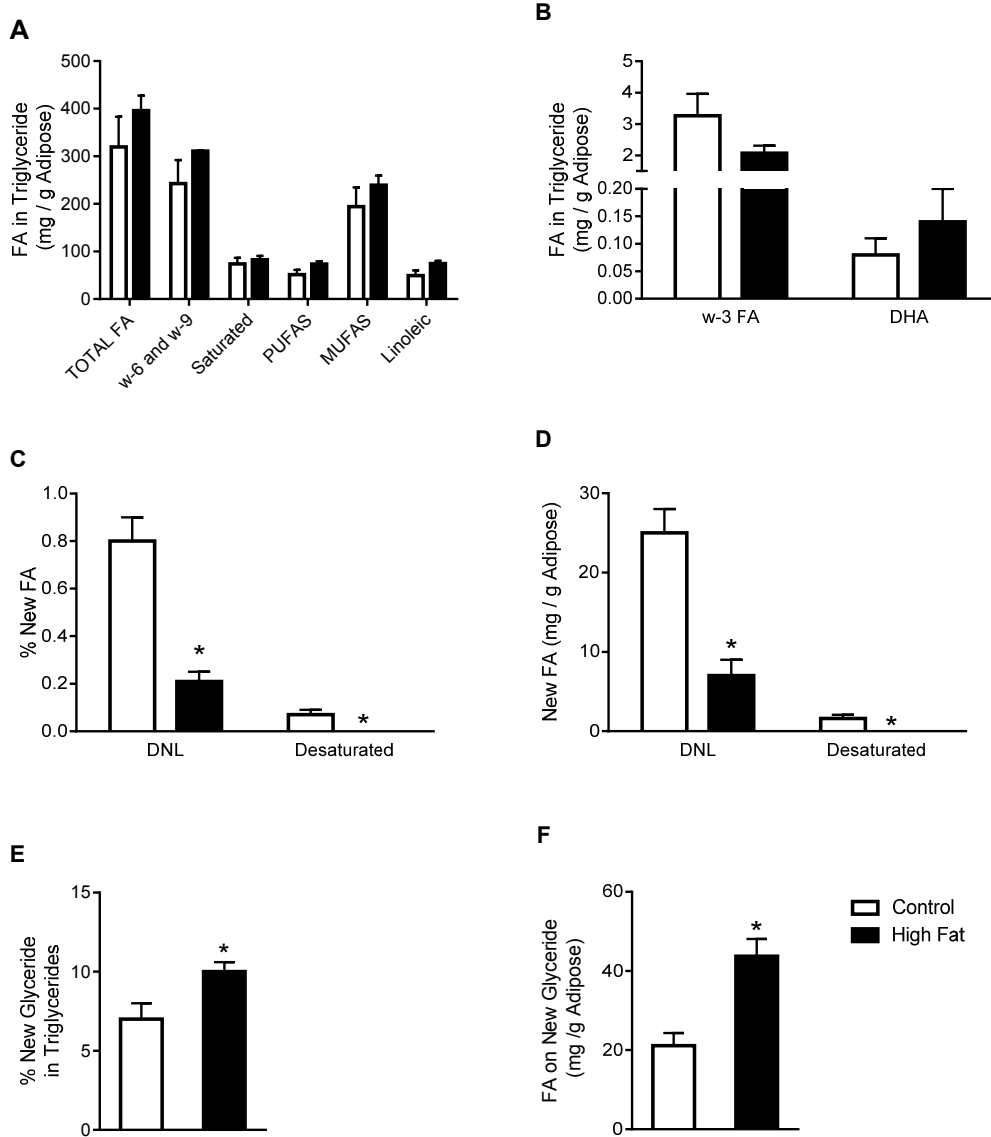

**Supplemental Figure 1:** Lipidomic and flux in adipose of mice fed a low fat control or HFD. (A-B) Lipid species determined from  $^1\text{H}$  NMR spectra of liver. (C) Percent contribution of de novo lipogenesis (DNL) and desaturation and elongation to adipose triglyceride fatty acids during 4 days of  $^2\text{H}_2\text{O}$  exposure. (D) Mass of triglyceride fatty acids derived from DNL and desaturation. (E) Percent of triglyceride glycerol that was newly made during  $^2\text{H}_2\text{O}$  exposure. (F) Mass of fatty acids on new glyceride. Data are presented as the mean  $\pm$  SE (n=4-5). \* Different from control  $p < 0.05$ .
